# Supplementary material for: Enhanced visible light harnessing and oxygen vacancy promoted N, S co-doped CeO2 nanoparticle: a challenging photocatalyst for Cr(vi) reduction
Source: Royal Society of Chemistry journal article supplement (doi:10.1039/c7cy00499k), 2017-01-01
Supplement: c7cy00499k1.pdf [file c7cy00499k1.pdf]

### Supplementary Information

**Enhanced visible light harnessing and oxygen vacancy promoted N, S co-doped CeO<sub>2</sub> nanoparticle:**

**A challenging photocatalyst for Cr(VI) reduction**

**S. Mansingh<sup>a</sup>, D. K. Padhi<sup>bc</sup> and K. M. Parida<sup>a\*</sup>**

<sup>a</sup> Centre for Nano Science and Nano Technology SOA University, Bhubaneswar—751 030, Odisha, India.

<sup>b</sup> Environment & Sustainability Department, CSIR-Institute of Minerals and Materials Technology, Bhubaneswar – 751 013, Odisha, India.

<sup>c</sup> Academy of Scientific and Innovative Research (AcSIR), Council of Scientific and Industrial Research, AnusandhanBhawan, 2 Rafi Marg, New Delhi-110 001, India.

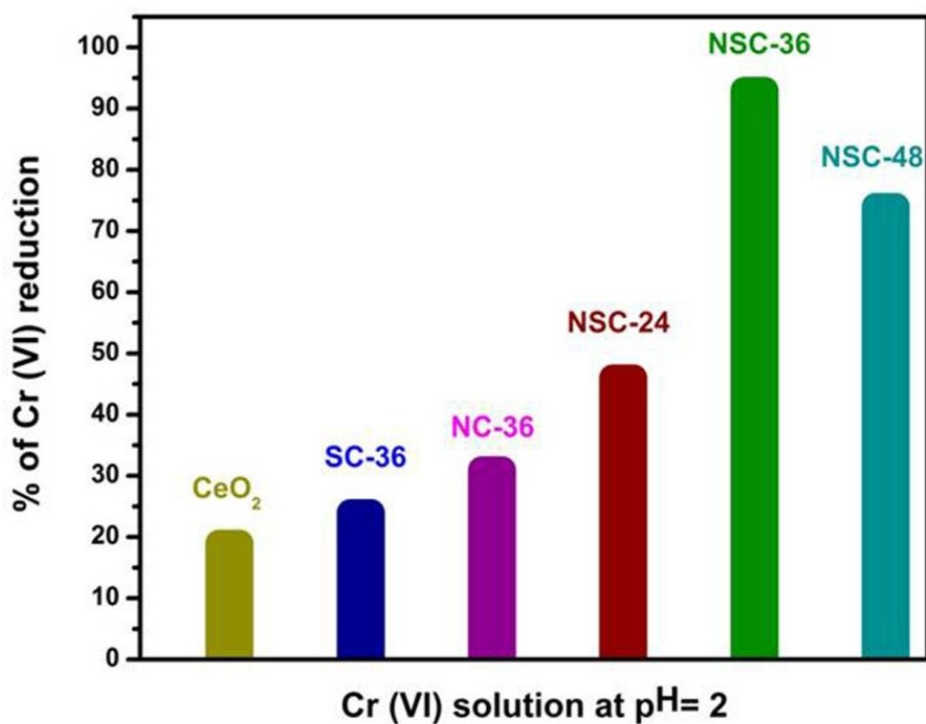

**Figure S1. Photo-reduction of Cr(VI) by neat CeO<sub>2</sub>, SC-36, NC-36, NCS-24, NCS-36 and NCS-48 under Visible-light irradiation [catalyst dose = 1g/L; [Cr(VI)] = 50 mg/L; time = 120 min]**

## Mott-Schottky

Mott-Schottky measurements was carried out to know the flat band edge potential and type of semiconducting material (n or p), which are important parameter of photochemical reaction because of their impact on charge transfer mechanism and recombination probability. The electrochemical flat band potential of the as prepared photocatalysts were calculated from by the following equation:

$$\frac{1}{C^2} = \frac{2}{\epsilon \epsilon_0 N_D} \left( E - E_{fb} - \frac{k_b T}{q} \right) \dots \dots \dots (2)$$

Where the symbols have specific notations such as C is the space charge capacitance,  $\epsilon$  and  $\epsilon_0$  are the dielectric constants of free space and material electrodes respectively,  $N_D$  is the donor density,  $k_b$  is the Boltz's man constant, q is the electronic charge and T is the absolute temp.

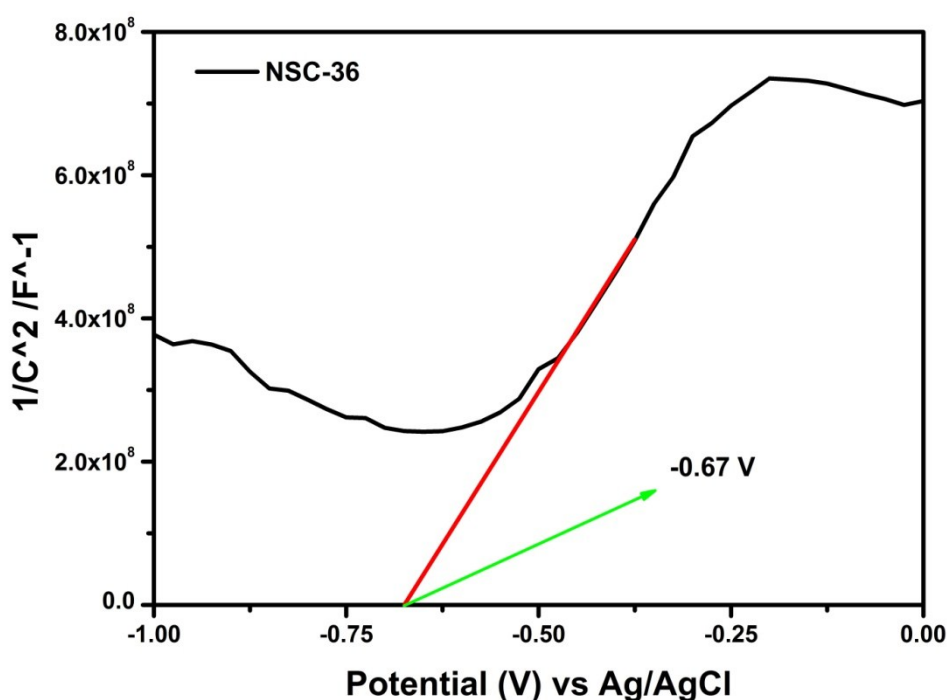

**Figure S2. Mott-Schotky plot of NSC-36 photocatalyst measured 1k Hz.**

The flat band ( $E_{fb}$ ) potential of the semiconductor was determined from the intercept of the straight line on potential axis as shown in fig(1) and the nature of tangent indicates the type of extrinsic material i.e. positive slope for n-type and negative for p-type materials. In this case the  $E_{fb}$  value for the n-type doped

CeO<sub>2</sub> is computed to be -0.67 V vs Ag/AgCl electrode. Hence, the conduction bandage potential of NSC-36 was determined to -0.41 eVvs NHE. Accordingly, its corresponding valence band potential (VB) was calculated to be 1.78 eVvs NHE.

## Reference

- [1] Y. C. Zhang, M. Yang, G. Zhang, D. D. Dionysiou, *Appl. Catal. B-Environ.* **2013**, *142*, 249-258.
- [2] X. F. Lei, X. X. Xue, H. Yang, C. Chen, X. Li, J. X. Pei, X. Y. Gao, *Journal of Alloys and Compounds*, **2015**, *646*, 541-549.
- [3] A. E. Giannakas, E. Seristatidou, Y. Deligiannakis, I. Konstantinou, *Appl. Catal. B-Environ.* **2013**, *132*, 460-468.
- [4] J. Zai, F. Cao, N. Liang, K. Yu, Y. Tian, H. Sun, X. Qian, *Journal of Hazardous Materials*. **2017**, *321*, 464-472.
